# Supplementary material for: Benzothiophene based semi-bis-chalcone as a photo-luminescent chemosensor with real-time hydrazine sensing and DFT studies
Source: Royal Society of Chemistry journal article supplement (doi:10.1039/d4va00306c), 2024-10-31
Supplement: d4va00306c1.pdf [file d4va00306c1.pdf]

## Supporting Information

### **Benzothiophene Based Semi-Bis-Chalcone as Photo-Luminescent Chemo-Sensor with Real Time Hydrazine Sensing and DFT Studies**

Nidhi H. Oza, Dinkal Kasundra, Amar G. Deshmukh, Niteen Borane, Rajamouli Boddula,  
Paresh N. Patel\*

Laboratory of Bio-Organic Chemistry, Tarsadia Institute of Chemical Science (TICS),  
Uka Tarsadia University, Bardoli - 394 350, Gujarat, India

\*Corresponding author e-mail: [pareshn111@yahoo.com](mailto:pareshn111@yahoo.com)

#### **General Information and Material:**

All the chemicals were obtained from Sigma–Aldrich and were used without further purification. Solvents were dried over molecular sieves if necessary. The <sup>1</sup>H, H-H Cosy and HERTCORE NMR spectra were recorded in CDCl<sub>3</sub> or DMSO-*d*<sub>6</sub> at room temperature using a Bruker AVANCE III 500 MHz (AV 500) multi nuclei solution NMR Spectrometer, TMS was used as internal reference, integration, multiplicity (s = singlet, d = doublet, t = triplet, q = quartet, quin = quintet, m = multiplet, br = broad, app = apparent), coupling constants (J; Hz), and assignment. <sup>13</sup>C and DEPT-135 NMR spectra were measured on Bruker AVANCE III 125 MHz (AV 125) with complete proton decoupling. Chemical shifts were reported in ppm from the residual solvent as an internal standard. Infrared (IR) spectra were recorded neat by ATR on a Thermo Nicolet iS50 FT–IR spectrometer and are reported in cm<sup>-1</sup>. HR–MS data were obtained in methanol, with Thermo Scientific Orbitrap Elite Mass spectrometer. Melting point is measured by open capillary method using Sigma Melting Point Apparatus. Single crystal structural data were recorded on Bruker Kappa APEXII. High performance liquid chromatography (HPLC) was performed on JASCO instruments at 210 nm using 4.6 mm x 25 cm Daicel CHIRALCEL OJ-H. Optical rotations were measured on a Rudolph Autopol IV digital polarimeter. For thin layer chromatography (TLC) analysis throughout this work, Merck precoated TLC plates (silica gel 60 GF254, 0.25 mm) were used. The products were purified by recrystallization or column chromatography silica gel 60 (Merck, 230-400 mesh).

### Spectral data:

#### **(1E,4E)-1,5-bis(benzo[*b*]thiophen-2-yl)penta-1,4-dien-3-one (SBC 3a)**

Yellow solid; Yield 80 %; M.P. 152-160 °C; IR ( $\nu$ ,  $\text{cm}^{-1}$ ): 825 (C-S), 1100 (C-C), 1600 (C=C), 1789 (C=O), 3025 (C-H);  $^1\text{H}$  NMR (500 MHz,  $\text{CDCl}_3$ )  $\delta$ ppm: 7.965 (d,  $J=15.5$  Hz, 2H), 7.817 (dd,  $J=16.0, 7.5$  Hz, 4H), 7.574 (s, 2H), 7.417-7.386 (m, 4H), 6.905 (d,  $J=15.5$  Hz, 2H),  $^{13}\text{C}$  NMR (125MHz,  $\text{CDCl}_3$ )  $\delta$ ppm: 187.46, 140.22, 139.75, 136.56, 130.00, 126.61, 125.02, 124.61, 122.58; HRMS (ESI; Ion Trap)  $m/z$ : [M+H] Calculated. ( $\text{C}_{21}\text{H}_{15}\text{OS}_2$ ) 347.0712, Observed: 347.0716.

#### **(1E,4E)-1,5-bis(benzo[*b*]thiophen-3-yl)penta-1,4-dien-3-one (SBC 3b)**

Yellow solid; Yield 85 %; M.P. 158-160 °C; IR ( $\nu$ ,  $\text{cm}^{-1}$ ): 814 (C-S), 1100 (C-C), 1621 (C=C), 1762 (C=O), 2914 (C-H);  $^1\text{H}$  NMR (500 MHz,  $\text{CDCl}_3$ )  $\delta$ ppm: 7.729 (d,  $J=15.5$  Hz, 1H), 7.637 (d,  $J=8.5$ , 2H), 7.598-7.534 (m, 3H), 7.467 (s, 1H), 7.411-7.371 (m, 2H), 7.318 (d,  $J=9.5$ , 1H), 7.071 (d,  $J=16$ , 2H), 6.687 (d,  $J=16$ , 2H);  $^{13}\text{C}$  NMR (125MHz,  $\text{CDCl}_3$ )  $\delta$ ppm: 188.85, 143.33, 143.04, 142.92, 140.16, 133.82, 128.96, 128.81, 127.95, 127.65, 127.36, 127.09, 125.38; HRMS (ESI; Ion Trap)  $m/z$ : [M+H] Calculated ( $\text{C}_{21}\text{H}_{15}\text{OS}_2$ ) 347.0730, Observed: 347.0736.

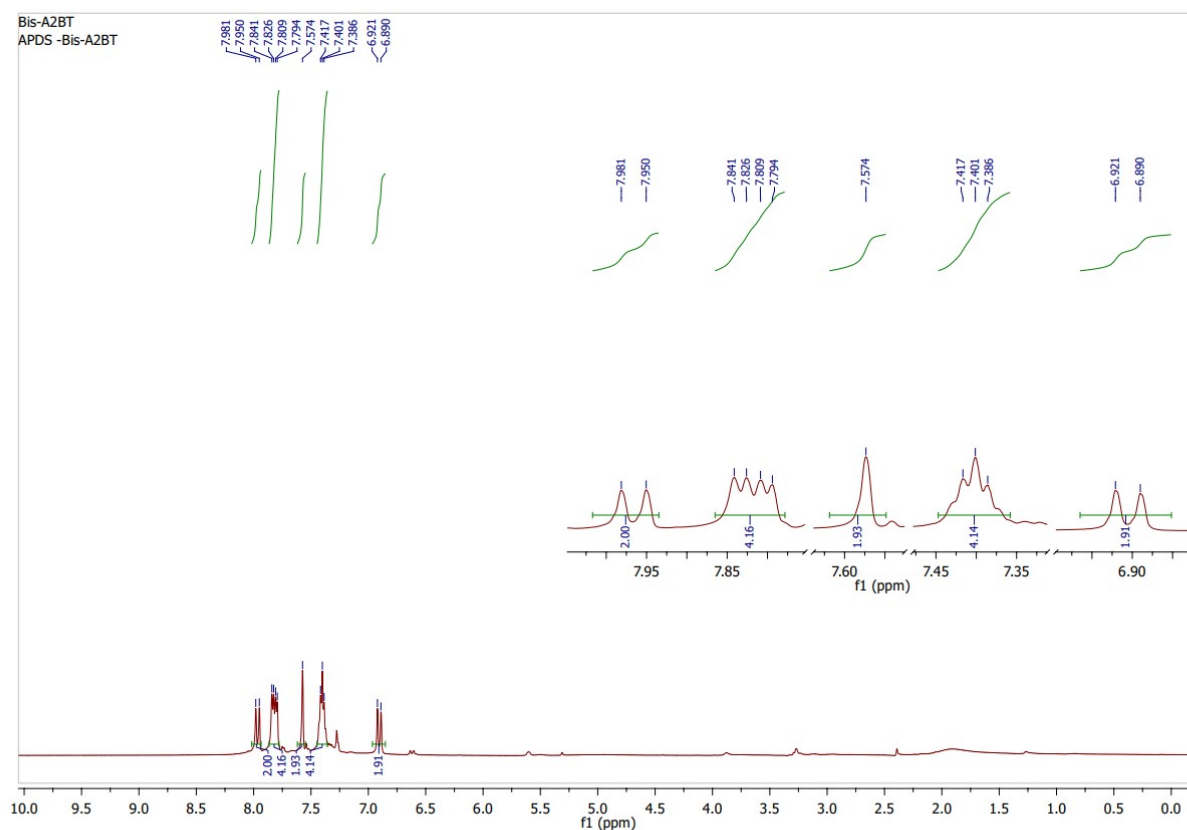

**Figure S1. <sup>1</sup>H NMR Spectra of SBC 3a**

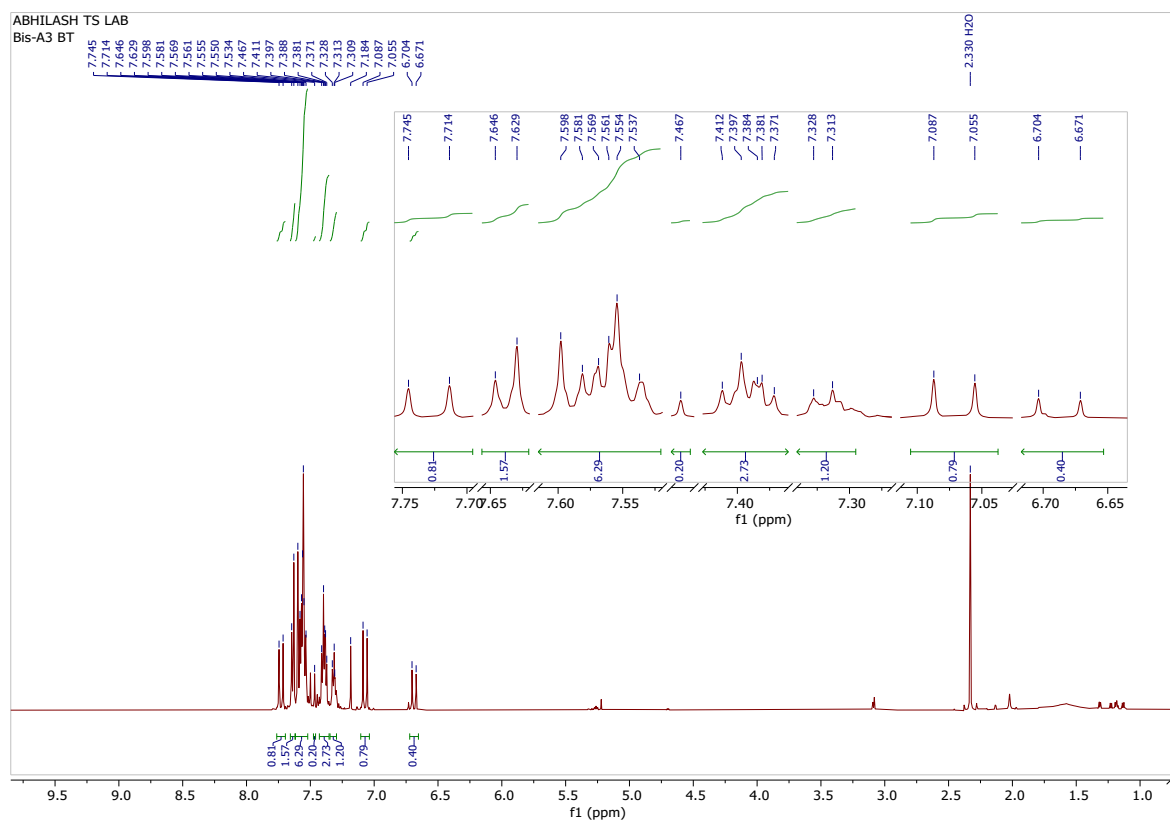

**Figure S2. <sup>1</sup>H NMR Spectra of SBC 3b**

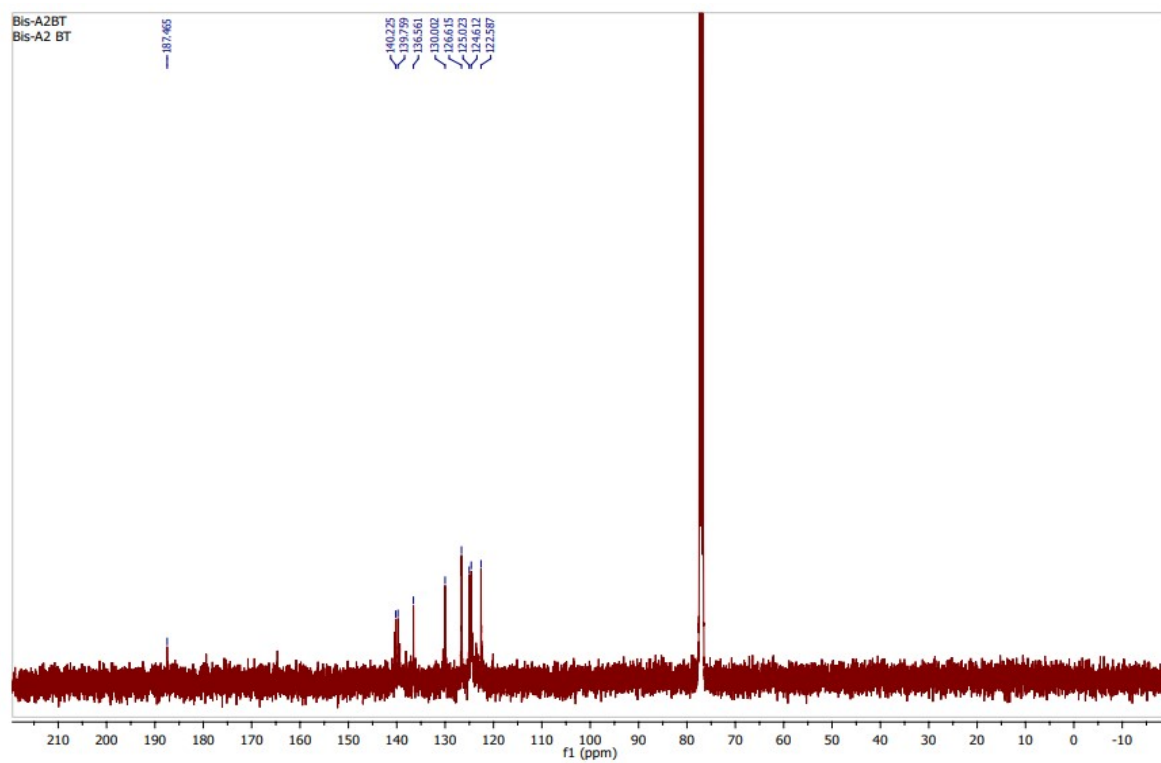

**Figure S3.**  $^{13}\text{C}$  NMR Spectra of SBC 3a

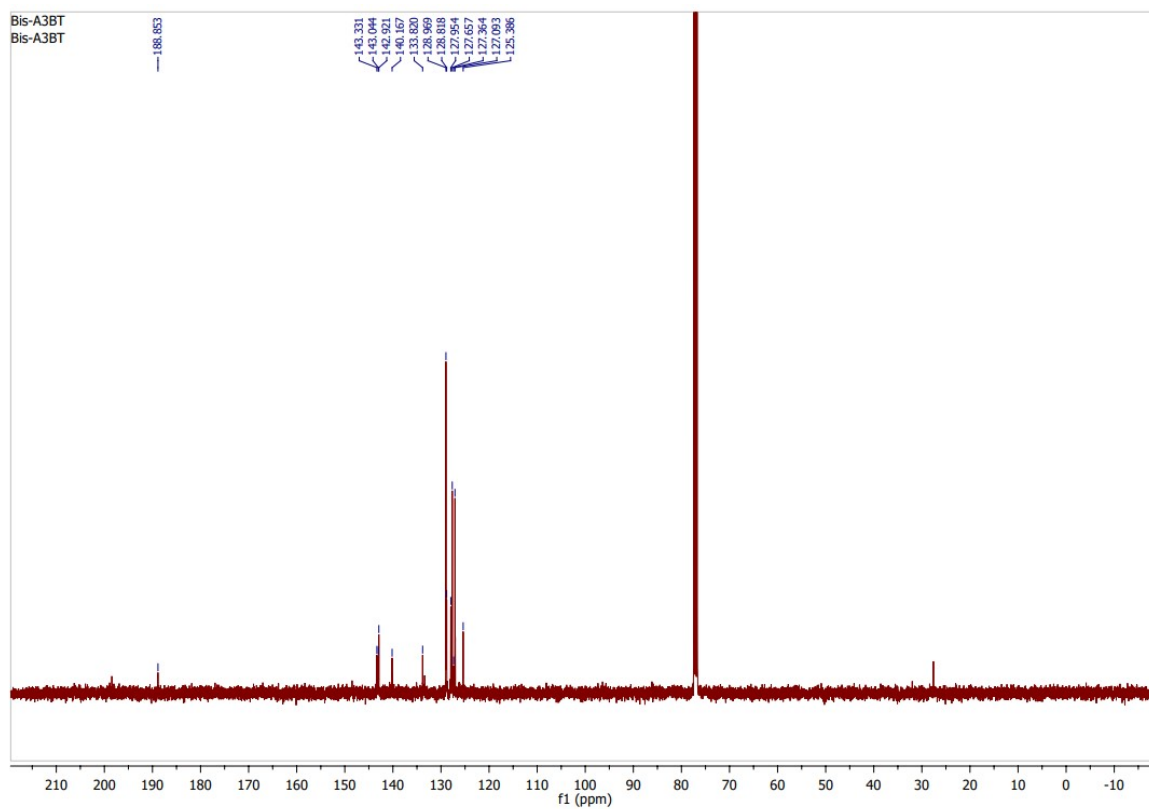

**Figure S4.**  $^{13}\text{C}$  NMR Spectra of SBC 3b

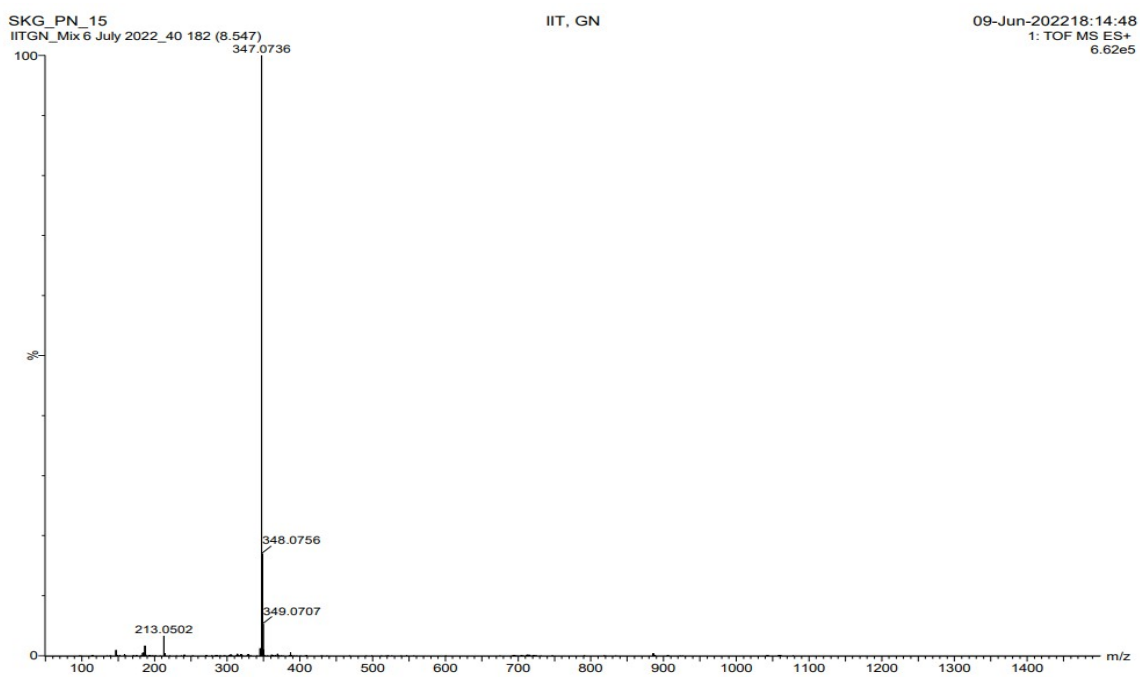

**Figure S5.** HRMS Spectra of SBC 3a

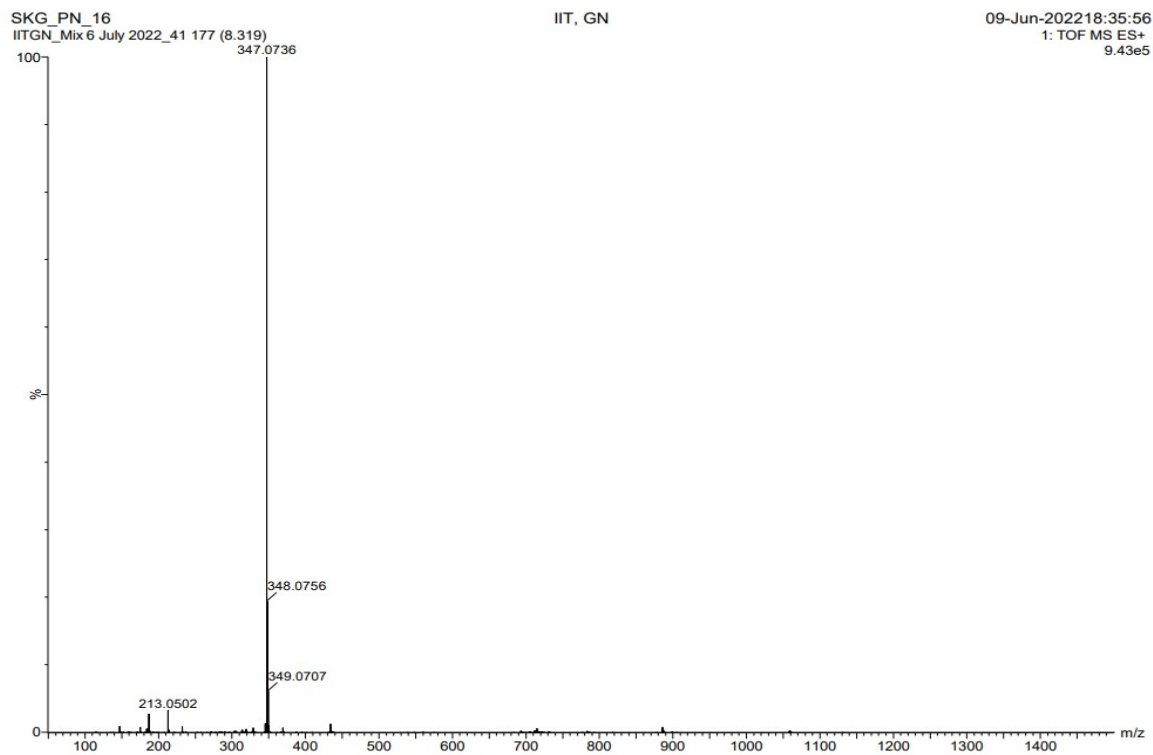

**Figure S6.** HRMS Spectra of SBC 3b

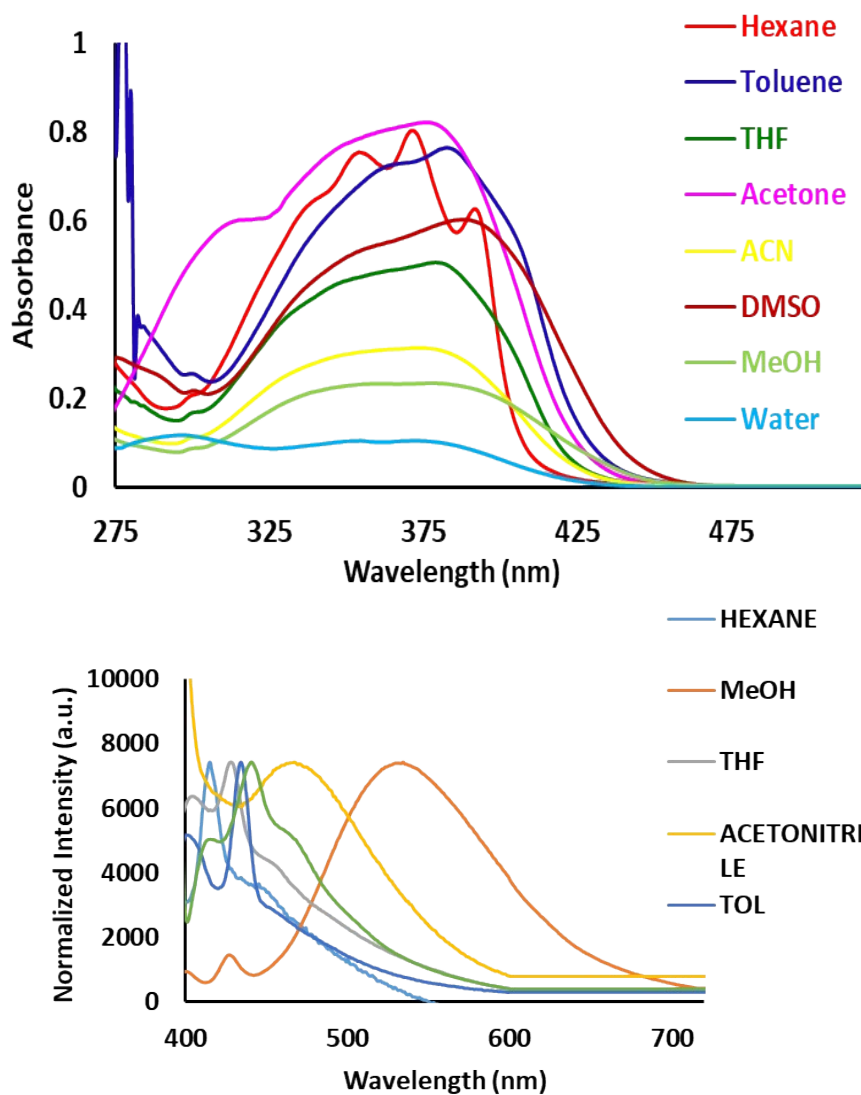

**Figure S7.** UV-Vis absorption and Fluorescence spectra of SBC 3a in different solvents with 5 $\mu$ M concentration

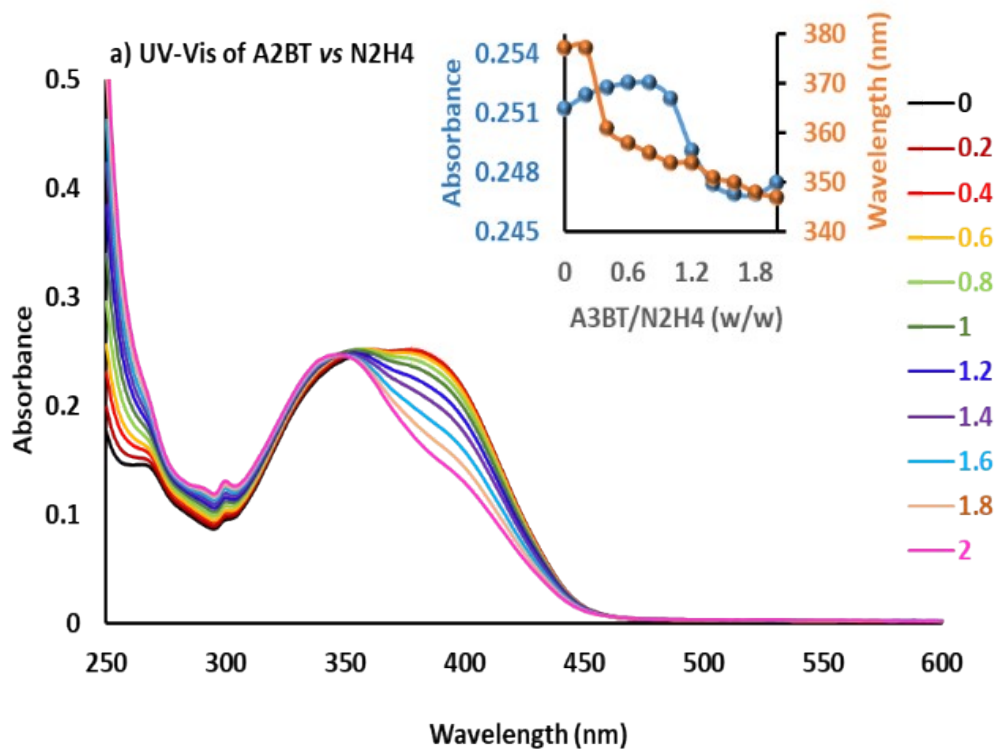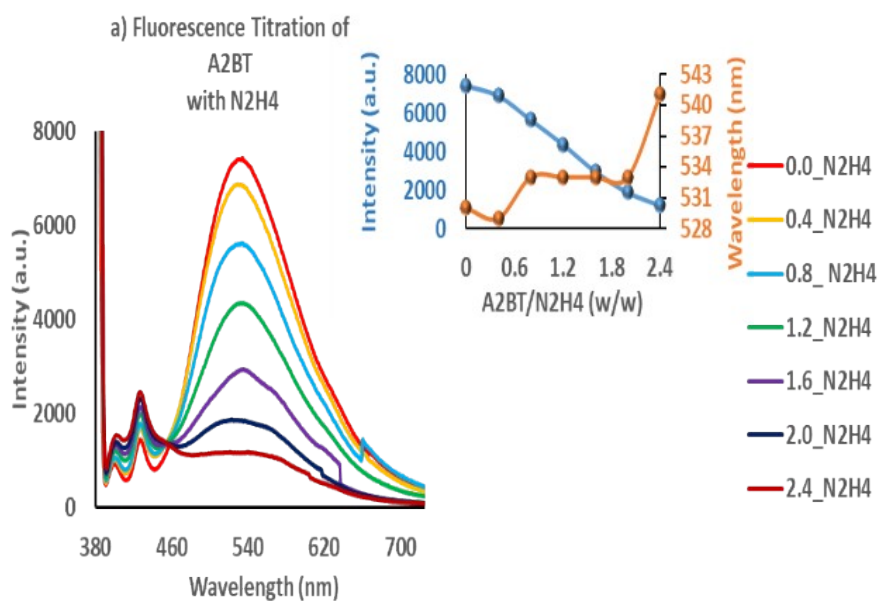

**Figure S8.** UV-Vis absorption and Fluorescence spectra of the 5  $\mu$ M SBC 3a solution in MeOH after addition of hydrazine. In inset represented hydrazine molar ratio vs absorbance and emission

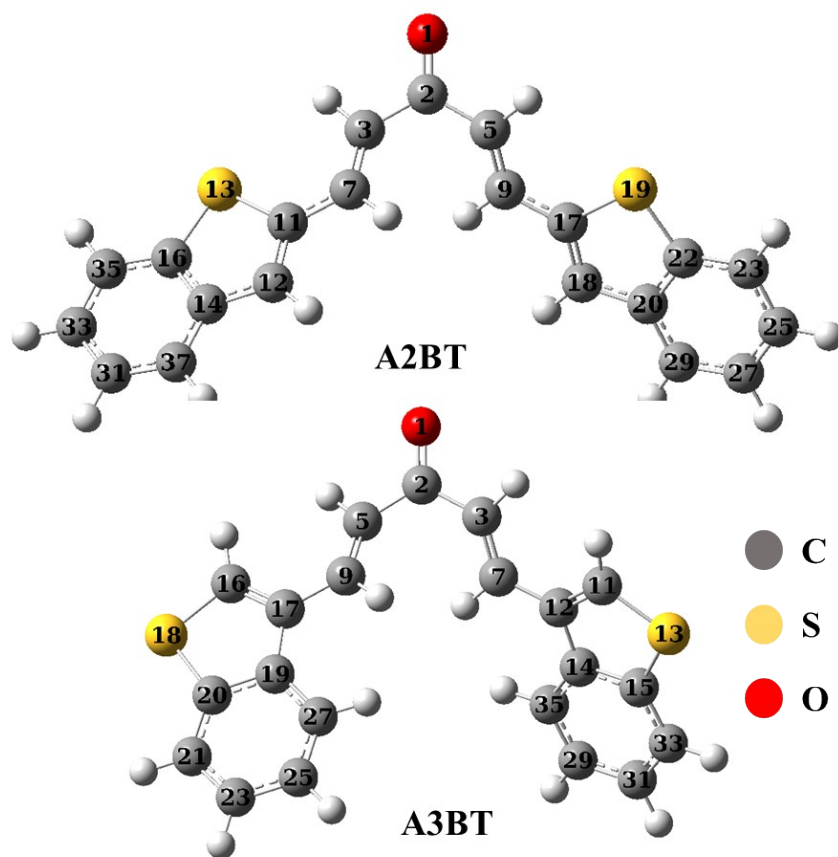

**Figure S9.** Optimized structures of SBC **3a** and **3b** with respective atom labelling



**Table S1.** The calculated bond angles and their dihedral angles of SBC **3a** and **3b**.

| <b>SBC 3a</b>  |                                                                                                                                                                            |
|----------------|----------------------------------------------------------------------------------------------------------------------------------------------------------------------------|
| Dihedral angle | 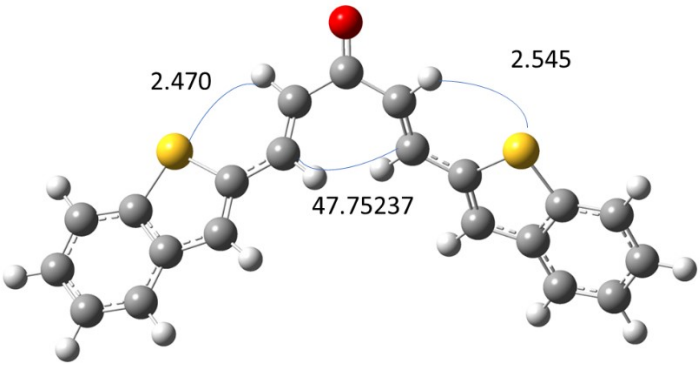 <p>2.470<br/>47.75237<br/>2.545</p>                                                     |
| Bond angle     |  <p>126.37927<br/>122.65566<br/>121.76766<br/>79.40123<br/>122.65805<br/>126.46361</p>  |
| <b>SBC 3b</b>  |                                                                                                                                                                            |
| Dihedral angle |  <p>-14.480<br/>47.581<br/>15.694</p>                                                  |
| Bond angle     |  <p>126.37927<br/>125.50648<br/>121.93495<br/>79.59222<br/>125.38895<br/>126.46361</p> |

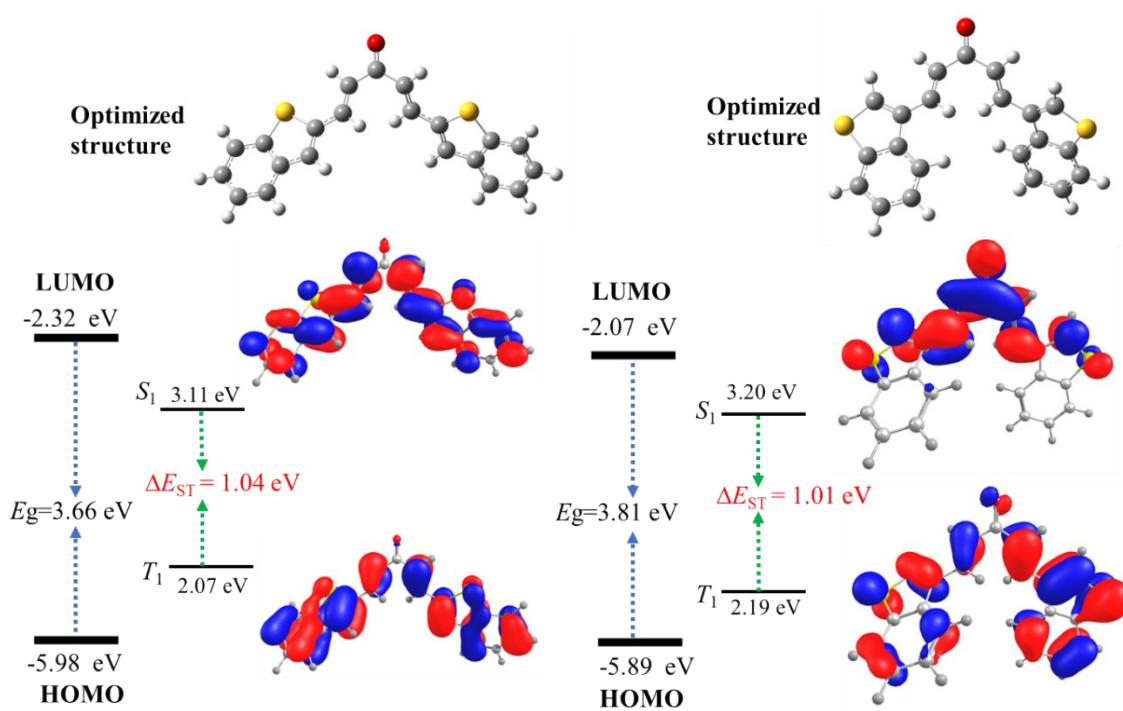

**Figure S10.** Frontier molecular orbital of the SBC **3a** and **3b** with respective electronic distribution of HOMO-LUMO in gas phase.

**Table S2. SBC 3a** energy, wavelength and their oscillation with along major contribution in solvent and Gas phase.

| Solvent         |               |                 |               |                                                   |
|-----------------|---------------|-----------------|---------------|---------------------------------------------------|
| State           | Energy (cm-1) | Wavelength (nm) | Osc. Strength | Major contribs                                    |
| Singlet         |               |                 |               |                                                   |
| S <sub>1</sub>  | 25204.19344   | 396.759373547   | 0.6728        | HOMO->LUMO (98%)                                  |
| S <sub>2</sub>  | 26372.09232   | 379.188722634   | 0.0621        | H-4->LUMO (58%), H-1->LUMO (36%)                  |
| S <sub>3</sub>  | 27240.75744   | 367.096987741   | 0.0785        | H-4->LUMO (25%), H-3->LUMO (24%), H-1->LUMO (47%) |
| S <sub>4</sub>  | 28188.46544   | 354.755033447   | 0.1293        | H-2->LUMO (96%)                                   |
| S <sub>5</sub>  | 29003.8976    | 344.781247607   | 0.0292        | H-4->LUMO (12%), H-3->LUMO (69%)                  |
| S <sub>6</sub>  | 31963.9728    | 312.852224677   | 0.3747        | H-1->L+1 (97%)                                    |
| S <sub>7</sub>  | 32945.55632   | 303.531071167   | 0.4682        | HOMO->L+1 (81%)                                   |
| S <sub>8</sub>  | 34116.68144   | 293.111744106   | 0.0552        | H-3->L+1 (92%)                                    |
| S <sub>9</sub>  | 34348.16416   | 291.136374958   | 0.0436        | H-2->L+1 (89%)                                    |
| S <sub>10</sub> | 36208.09152   | 276.181361132   | 0.0156        | H-4->L+1 (95%)                                    |
| Triplet         |               |                 |               |                                                   |
| T <sub>1</sub>  | 16971.63552   | 589.218404332   | 0.0           | H-1->LUMO (64%), HOMO->L+1 (23%)                  |
| T <sub>2</sub>  | 17563.65056   | 569.357717852   | 0.0           | H-1->L+1 (23%), HOMO->LUMO (69%)                  |
| T <sub>3</sub>  | 22840.97264   | 437.809727178   | 0.0           | H-4->LUMO (73%), H-3->LUMO (11%)                  |
| T <sub>4</sub>  | 24914.6384    | 401.370465003   | 0.0           | H-4->LUMO (13%), H-3->LUMO (59%), H-2->L+1 (14%)  |
| T <sub>5</sub>  | 25016.26496   | 399.739929841   | 0.0           | H-3->L+1 (15%), H-2->LUMO (76%)                   |
| T <sub>6</sub>  | 27037.50432   | 369.856621441   | 0.0           | H-1->LUMO (25%), HOMO->L+1 (52%)                  |
| T <sub>7</sub>  | 28049.73712   | 356.509580008   | 0.0           | H-1->L+1 (58%), HOMO->LUMO (26%)                  |
| T <sub>8</sub>  | 30137.92096   | 331.807891237   | 0.0           | H-6->L+1 (12%), H-5->LUMO (25%)                   |
| T <sub>9</sub>  | 30392.79392   | 329.025361285   | 0.0           | H-6->LUMO (18%), H-5->L+1 (13%), H-3->L+3 (10%)   |
| T <sub>10</sub> | 32297.08208   | 309.625494193   | 0.0           | H-2->L+1 (59%)                                    |
|                 |               |                 |               |                                                   |
| Gas             |               |                 |               |                                                   |
| Singlet         | Energy (cm-1) | Wavelength (nm) | Osc. Strength | Major contribs                                    |
| S <sub>1</sub>  | 25104.98656   | 398.3272        | 0.0086        | H-4->LUMO (77%), H-1->LUMO (12%)                  |
| S <sub>2</sub>  | 26245.4624    | 381.0182        | 0.5067        | HOMO->LUMO (97%)                                  |
| S <sub>3</sub>  | 27792.44448   | 359.81          | 0.0764        | H-2->LUMO (23%), H-1->LUMO (65%)                  |

|                 |                      |                        |                      |                                                   |
|-----------------|----------------------|------------------------|----------------------|---------------------------------------------------|
| S <sub>4</sub>  | 28835.32656          | 346.7968               | 0.1118               | H-3->LUMO (96%)                                   |
| S <sub>5</sub>  | 29464.44336          | 339.3921               | 0.0111               | H-4->LUMO (13%), H-2->LUMO (64%), HOMO->L+1 (13%) |
| S <sub>6</sub>  | 31888.96272          | 313.5881               | 0.4131               | H-1->L+1 (89%)                                    |
| S <sub>7</sub>  | 33697.27024          | 296.7599               | 0.263                | H-3->L+1 (27%), HOMO->L+1 (55%)                   |
| S <sub>8</sub>  | 33835.192            | 295.5503               | 0.0058               | H-4->L+1 (20%), H-2->L+1 (70%)                    |
| S <sub>9</sub>  | 34671.59472          | 288.4205               | 0.1447               | H-3->L+1 (66%), HOMO->L+1 (22%)                   |
| S <sub>10</sub> | 34813.54928          | 287.2445               | 0.0782               | H-4->L+1 (72%), H-2->L+1 (22%)                    |
| <b>Triplet</b>  | <b>Energy (cm-1)</b> | <b>Wavelength (nm)</b> | <b>Osc. Strength</b> | <b>Major contribs</b>                             |
| T <sub>1</sub>  | 16737.73312          | 597.452470314          | 0.0                  | H-1->LUMO (66%), HOMO->L+1 (22%)                  |
| T <sub>2</sub>  | 17770.12992          | 562.742087144          | 0.0                  | H-1->L+1 (26%), HOMO->LUMO (66%)                  |
| T <sub>3</sub>  | 21415.78112          | 466.945377522          | 0.0                  | H-4->LUMO (75%)                                   |
| T <sub>4</sub>  | 24996.10096          | 400.062394371          | 0.0                  | H-4->LUMO (11%), H-3->L+1 (13%), H-2->LUMO (57%)  |
| T <sub>5</sub>  | 25324.37088          | 394.876541944          | 0.0                  | H-3->LUMO (73%), H-2->L+1 (18%)                   |
| T <sub>6</sub>  | 27178.65232          | 367.935830013          | 0.0                  | H-1->LUMO (23%), HOMO->L+1 (49%)                  |
| T <sub>7</sub>  | 28187.65888          | 354.765184387          | 0.0                  | H-1->L+1 (59%), HOMO->LUMO (28%)                  |
| T <sub>8</sub>  | 30222.60976          | 330.878110111          | 0.0                  | H-6->L+1 (12%), H-5->LUMO (22%), H-3->L+3 (10%)   |
| T <sub>9</sub>  | 30294.3936           | 330.09408051           | 0.0                  | H-6->LUMO (16%), H-5->L+1 (12%), H-2->L+3 (11%)   |
| T <sub>10</sub> | 32330.9576           | 309.301076811          | 0.0                  | H-3->L+1 (50%)                                    |

**Table S3. SBC 3b** energy, wavelength and their oscillation with along major contribution in solvent and Gas phase.

| Solvent         |               |                 |               |                                                                   |
|-----------------|---------------|-----------------|---------------|-------------------------------------------------------------------|
| State           | Energy (cm-1) | Wavelength (nm) | Osc. Strength | Major contribs                                                    |
| <b>Singlet</b>  |               |                 |               |                                                                   |
| S <sub>1</sub>  | 25952.68      | 385.3166        | 0.397         | HOMO->LUMO (94%)                                                  |
| S <sub>2</sub>  | 27242.37      | 367.0753        | 0.0654        | H-4->LUMO (56%), H-1->LUMO (32%)                                  |
| S <sub>3</sub>  | 28332.84      | 352.9473        | 0.0584        | H-4->LUMO (33%), H-1->LUMO (63%)                                  |
| S <sub>4</sub>  | 32191.42      | 310.6418        | 0.026         | H-3->LUMO (61%), H-2->LUMO (22%), HOMO->L+1 (13%)                 |
| S <sub>5</sub>  | 32200.29      | 310.5562        | 0.0381        | H-3->LUMO (22%), H-2->LUMO (59%), H-1->L+1 (14%)                  |
| S <sub>6</sub>  | 33316.57      | 303.1509        | 0.1502        | H-2->LUMO (11%), H-1->L+1 (77%)                                   |
| S <sub>7</sub>  | 33418.2       | 299.2381        | 0.0084        | HOMO->L+1 (72%)                                                   |
| S <sub>8</sub>  | 36996.1       | 270.2988        | 0.1797        | H-6->LUMO (90%)                                                   |
| S <sub>9</sub>  | 37348.57      | 267.7479        | 0.0048        | H-5->LUMO (12%), H-4->L+1 (43%), H-2->L+1 (19%)                   |
| S <sub>10</sub> | 37510.69      | 266.5907        | 0.0101        | H-4->L+1 (35%), H-2->L+1 (10%), HOMO->L+2 (35%)                   |
| <b>Triplet</b>  |               |                 |               |                                                                   |
| T <sub>1</sub>  | 17970.96336   | 556.453196174   | 0.0           | H-1->LUMO (62%), HOMO->L+1 (20%)                                  |
| T <sub>2</sub>  | 18636.37536   | 536.585028302   | 0.0           | H-1->L+1 (20%), HOMO->LUMO (64%)                                  |
| T <sub>3</sub>  | 23586.23408   | 423.976119548   | 0.0           | H-4->LUMO (79%)                                                   |
| T <sub>4</sub>  | 26689.87696   | 374.673889092   | 0.0           | H-5->LUMO (12%), H-1->LUMO (11%), H-1->L+2 (16%), HOMO->L+1 (26%) |
| T <sub>5</sub>  | 27252.04928   | 366.944881732   | 0.0           | H-1->L+1 (21%), HOMO->LUMO (12%), HOMO->L+2 (22%)                 |
| T <sub>6</sub>  | 29295.87232   | 341.345015802   | 0.0           | H-3->LUMO (18%), H-1->LUMO (18%), HOMO->L+3 (12%)                 |
| T <sub>7</sub>  | 29519.28944   | 338.76154168    | 0.0           | H-3->LUMO (38%), H-2->LUMO (11%)                                  |
| T <sub>8</sub>  | 29816.10352   | 335.389229961   | 0.0           | H-2->LUMO (49%), H-2->L+1 (14%), HOMO->L+1 (15%)                  |
| T <sub>9</sub>  | 30237.9344    | 330.710420484   | 0.0           | H-1->L+1 (39%), HOMO->LUMO (15%)                                  |
| T <sub>10</sub> | 31636.50944   | 316.090497245   | 0.0           | H-5->LUMO (29%)                                                   |
| <b>Gas</b>      |               |                 |               |                                                                   |
| <b>Singlet</b>  |               |                 |               |                                                                   |
| S <sub>1</sub>  | 25872.83      | 386.5058        | 0.0285        | H-2->LUMO (71%), HOMO->LUMO (16%)                                 |
| S <sub>2</sub>  | 27215.75      | 367.4342        | 0.3035        | H-2->LUMO (10%), HOMO->LUMO (78%)                                 |
| S <sub>3</sub>  | 28980.51      | 345.0595        | 0.0576        | H-2->LUMO (11%), H-1->LUMO                                        |

|                 |                      |                        |                      |                                                                   |
|-----------------|----------------------|------------------------|----------------------|-------------------------------------------------------------------|
|                 |                      |                        |                      | (77%)                                                             |
| S <sub>4</sub>  | 32703.59             | 305.7768               | 0.1297               | H-4->LUMO (11%), H-3->LUMO (23%), H-1->L+1 (50%)                  |
| S <sub>5</sub>  | 32989.92             | 303.1229               | 0.0244               | H-4->LUMO (40%), H-3->LUMO (25%), HOMO->L+1 (22%)                 |
| S <sub>6</sub>  | 33588.38             | 297.722                | 0.0539               | H-4->LUMO (24%), H-3->LUMO (36%), H-1->L+1 (25%)                  |
| S <sub>7</sub>  | 33972.31             | 294.3574               | 0.0049               | H-4->LUMO (19%), H-3->LUMO (10%), H-1->L+1 (10%), HOMO->L+1 (48%) |
| S <sub>8</sub>  | 35707.22             | 280.0554               | 0.0054               | H-2->L+1 (90%)                                                    |
| S <sub>9</sub>  | 37417.12             | 267.2573               | 0.017                | H-3->L+1 (23%), HOMO->L+2 (41%)                                   |
| S <sub>10</sub> | 37605.86             | 265.916                | 0.023                | H-5->LUMO (12%), H-4->L+1 (16%), H-1->L+2 (37%), HOMO->L+2 (10%)  |
| <b>Triplet</b>  | <b>Energy (cm-1)</b> | <b>Wavelength (nm)</b> | <b>Osc. Strength</b> | <b>Major contribs</b>                                             |
| T <sub>1</sub>  | 17718.51008          | 564.381539692          | 0.0                  | H-1->LUMO (61%), HOMO->L+1 (18%)                                  |
| T <sub>2</sub>  | 18790.42832          | 532.185846416          | 0.0                  | H-1->L+1 (21%), HOMO->LUMO (59%)                                  |
| T <sub>3</sub>  | 22238.47232          | 449.671175974          | 0.0                  | H-2->LUMO (77%)                                                   |
| T <sub>4</sub>  | 26524.53216          | 377.009477101          | 0.0                  | H-5->LUMO (13%), H-1->L+2 (17%), HOMO->L+1 (25%)                  |
| T <sub>5</sub>  | 27346.4168           | 365.678621559          | 0.0                  | H-1->L+1 (16%), H-1->L+3 (10%), HOMO->LUMO (11%), HOMO->L+2 (20%) |
| T <sub>6</sub>  | 29529.77472          | 338.64125598           | 0.0                  | H-1->LUMO (14%), HOMO->L+1 (19%), HOMO->L+3 (15%)                 |
| T <sub>7</sub>  | 29861.27088          | 334.881929178          | 0.0                  | H-4->LUMO (36%), HOMO->LUMO (10%)                                 |
| T <sub>8</sub>  | 30250.83936          | 330.569339944          | 0.0                  | H-4->LUMO (14%), H-3->LUMO (39%), H-3->L+1 (13%), HOMO->L+1 (11%) |
| T <sub>9</sub>  | 30354.8856           | 329.436260501          | 0.0                  | H-4->LUMO (15%), H-3->LUMO (19%), H-1->L+1 (33%)                  |
| T <sub>10</sub> | 31726.84416          | 315.190503965          | 0.0                  | H-5->LUMO (29%)                                                   |

**Table S4.** Molecular orbital distribution with HOMO-LUMO energy levels

|        | SBC 3a                                                                              |        | SBC 3b                                                                               |
|--------|-------------------------------------------------------------------------------------|--------|--------------------------------------------------------------------------------------|
| LUMO+1 | 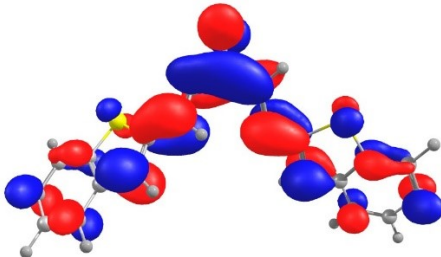   | LUMO+1 |    |
| LUMO   |    | LUMO   |   |
| HOMO   |  | HOMO   |  |
| HOMO-1 |  | HOMO-1 |  |

**Table S5.** Optimized coordinates of the SBC **3a** and **3b** molecules.

**SBC 3a**

|    |              |              |              |
|----|--------------|--------------|--------------|
| 8  | -0.608092000 | 0.400520000  | 0.210319000  |
| 6  | -1.838140000 | 0.400071000  | 0.241073000  |
| 6  | -2.553803000 | -0.878302000 | 0.473249000  |
| 1  | -1.939597000 | -1.633186000 | 0.959562000  |
| 6  | -2.565535000 | 1.677774000  | 0.044894000  |
| 1  | -1.976878000 | 2.433201000  | -0.471273000 |
| 6  | -3.783685000 | -1.186662000 | 0.008460000  |
| 1  | -4.344433000 | -0.435478000 | -0.543287000 |
| 6  | -3.771166000 | 1.985099000  | 0.570031000  |
| 1  | -4.303157000 | 1.233465000  | 1.148969000  |
| 6  | -4.457629000 | -2.459565000 | 0.131187000  |
| 6  | -5.691358000 | -2.765200000 | -0.383613000 |
| 16 | -3.754777000 | -3.833151000 | 1.000828000  |
| 6  | -6.124172000 | -4.102438000 | -0.108165000 |
| 1  | -6.278301000 | -2.050135000 | -0.950456000 |
| 6  | -5.163446000 | -4.821179000 | 0.648954000  |
| 6  | -4.451462000 | 3.257360000  | 0.480755000  |
| 6  | -5.657747000 | 3.562413000  | 1.057279000  |
| 16 | -3.794758000 | 4.630888000  | -0.424323000 |
| 6  | -6.105061000 | 4.899101000  | 0.803254000  |
| 1  | -6.214577000 | 2.847275000  | 1.653642000  |
| 6  | -5.184560000 | 5.618052000  | -0.002109000 |
| 6  | -5.419456000 | 6.944324000  | -0.374550000 |
| 1  | -4.708213000 | 7.485266000  | -0.990610000 |
| 6  | -6.58883000  | 7.555970000  | 0.064949000  |



|   |              |              |              |
|---|--------------|--------------|--------------|
| 1 | -6.789016000 | 8.586080000  | -0.213631000 |
| 6 | -7.513960000 | 6.859621000  | 0.864736000  |
| 1 | -8.418642000 | 7.360686000  | 1.194938000  |
| 6 | -7.281019000 | 5.543514000  | 1.234369000  |
| 1 | -7.995187000 | 5.006954000  | 1.852344000  |
| 6 | -7.532889000 | -6.064033000 | -0.099396000 |
| 1 | -8.452831000 | -6.565559000 | -0.383522000 |
| 6 | -6.567843000 | -6.760202000 | 0.651836000  |
| 1 | -6.752747000 | -7.790683000 | 0.939418000  |
| 6 | -5.378077000 | -6.147908000 | 1.031830000  |
| 1 | -4.636011000 | -6.688723000 | 1.610513000  |
| 6 | -7.320023000 | -4.747484000 | -0.479436000 |
| 1 | -8.065089000 | -4.211072000 | -1.059922000 |

**SBC 3b**

|   |              |              |              |
|---|--------------|--------------|--------------|
| 8 | -0.351582000 | -0.355787000 | 0.049728000  |
| 6 | -1.558907000 | -0.141954000 | 0.158358000  |
| 6 | -2.423167000 | -1.180178000 | 0.771049000  |
| 1 | -1.868361000 | -1.891168000 | 1.378803000  |
| 6 | -2.107714000 | 1.146751000  | -0.332884000 |
| 1 | -1.484031000 | 1.615199000  | -1.091061000 |
| 6 | -3.732776000 | -1.369442000 | 0.507982000  |
| 1 | -4.216981000 | -0.687368000 | -0.185785000 |
| 6 | -3.176174000 | 1.792219000  | 0.177356000  |
| 1 | -3.742225000 | 1.301950000  | 0.964713000  |
| 6 | -4.276072000 | -3.223921000 | 2.117476000  |
| 6 | -4.579738000 | -2.431217000 | 1.041127000  |

|    |              |              |              |
|----|--------------|--------------|--------------|
| 16 | -5.506425000 | -4.383109000 | 2.517335000  |
| 6  | -5.887645000 | -2.760477000 | 0.491655000  |
| 6  | -6.516944000 | -3.814089000 | 1.196149000  |
| 6  | -2.932857000 | 4.042690000  | -0.922435000 |
| 6  | -3.645948000 | 3.121852000  | -0.199992000 |
| 16 | -3.775002000 | 5.537090000  | -1.199022000 |
| 6  | -4.957279000 | 3.636609000  | 0.168939000  |
| 6  | -5.174409000 | 4.949569000  | -0.312230000 |
| 6  | -6.369577000 | 5.636673000  | -0.080271000 |
| 1  | -6.515433000 | 6.643323000  | -0.459239000 |
| 6  | -7.366102000 | 4.998378000  | 0.648363000  |
| 1  | -8.301956000 | 5.513322000  | 0.842277000  |
| 6  | -7.173619000 | 3.693370000  | 1.134248000  |
| 1  | -7.964897000 | 3.210473000  | 1.699344000  |
| 6  | -5.986692000 | 3.013460000  | 0.898289000  |
| 1  | -5.858742000 | 2.003054000  | 1.274421000  |
| 6  | -7.816544000 | -2.668435000 | -0.963473000 |
| 1  | -8.334448000 | -2.228847000 | -1.810335000 |
| 6  | -8.423903000 | -3.714055000 | -0.246521000 |
| 1  | -9.404939000 | -4.072275000 | -0.542877000 |
| 6  | -7.778843000 | -4.297176000 | 0.837539000  |
| 1  | -8.242777000 | -5.107343000 | 1.391264000  |
| 6  | -6.561801000 | -2.194468000 | -0.606093000 |
| 1  | -6.103014000 | -1.394070000 | -1.178429000 |
| 1  | -3.383843000 | -3.178772000 | 2.726926000  |
| 1  | -1.923489000 | 3.936209000  | -1.295644000 |
